# Supplementary material
Source: PubMed Central journal article supplement (PMC3530171)

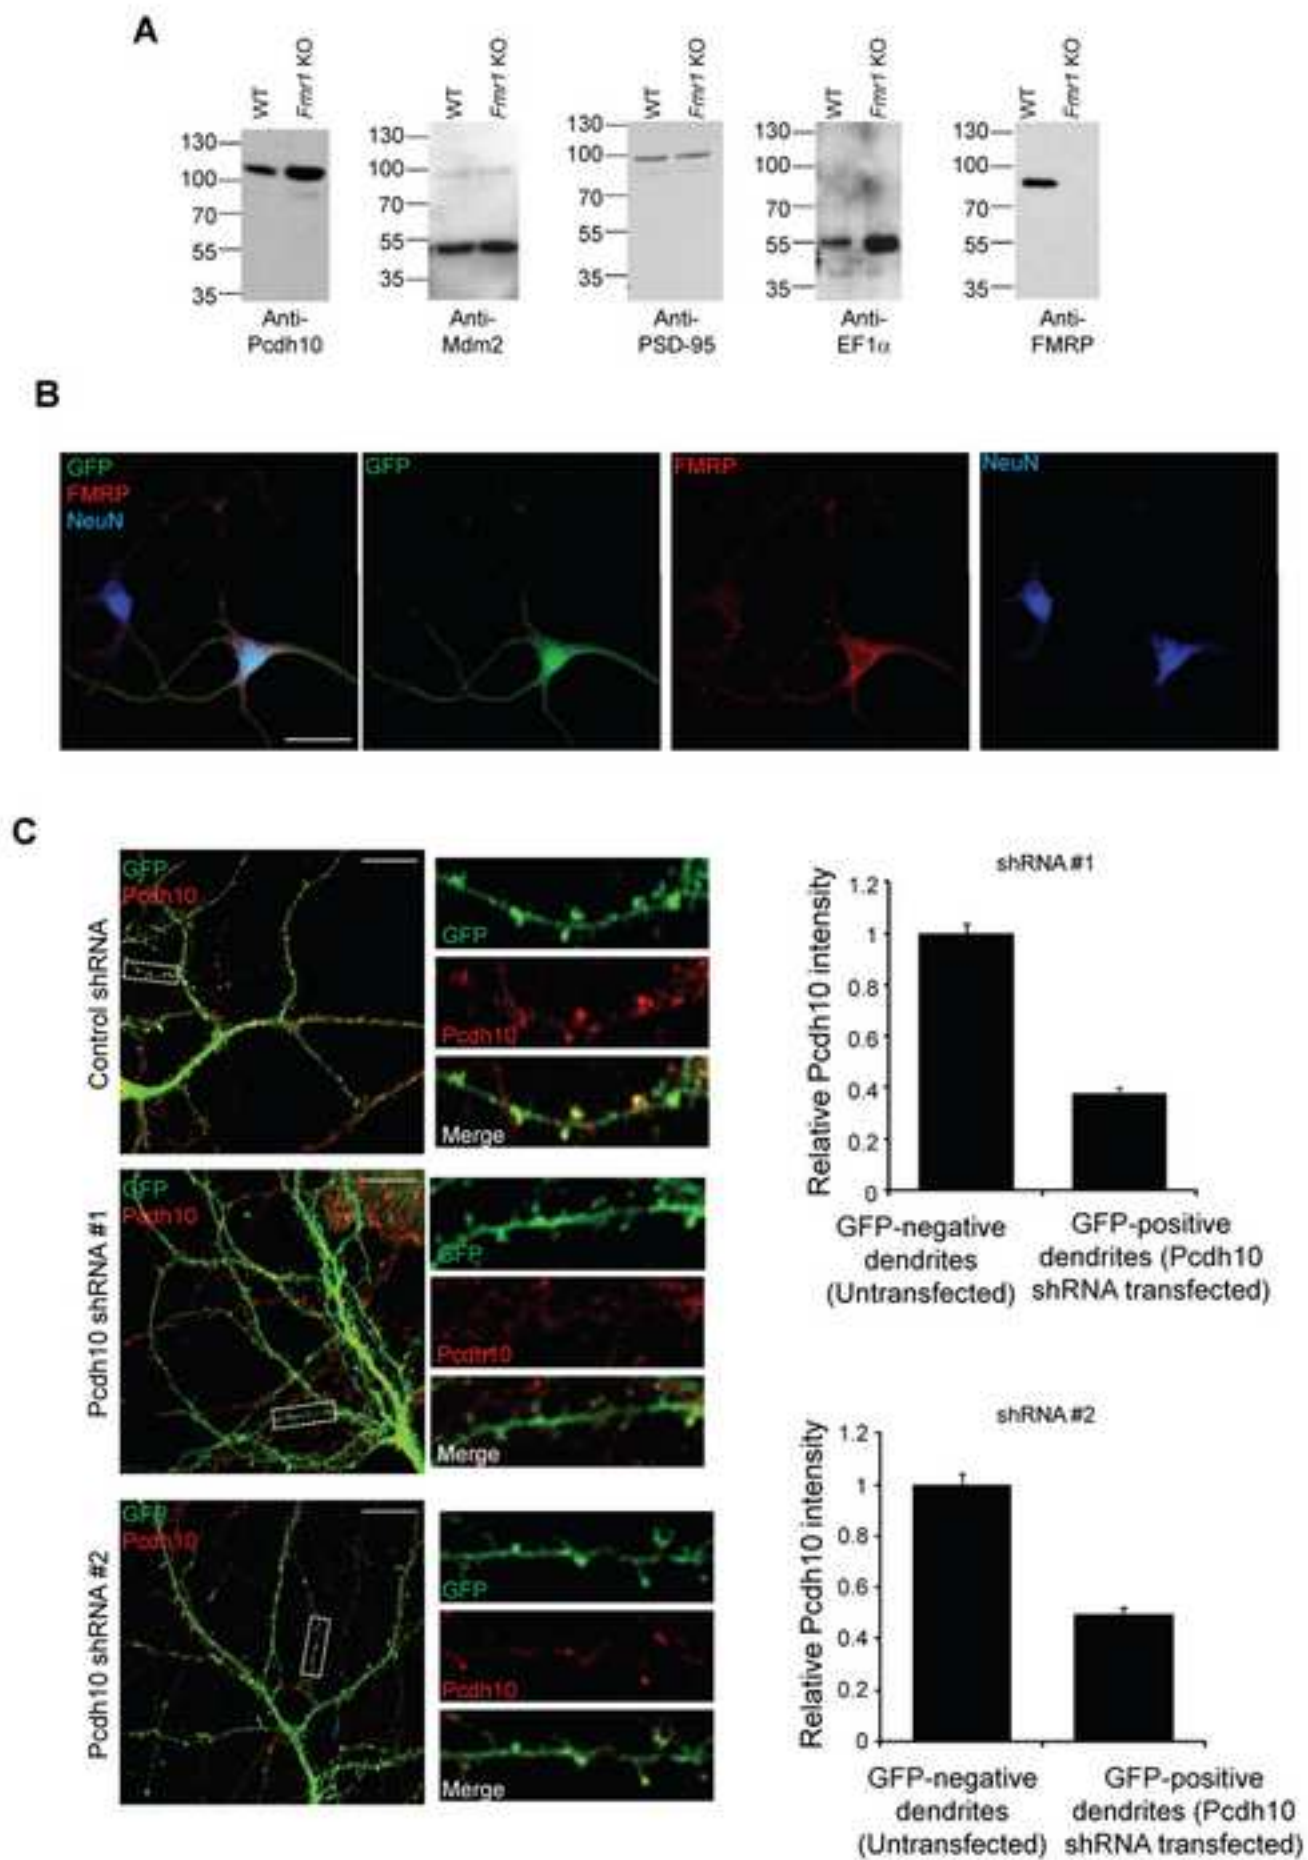

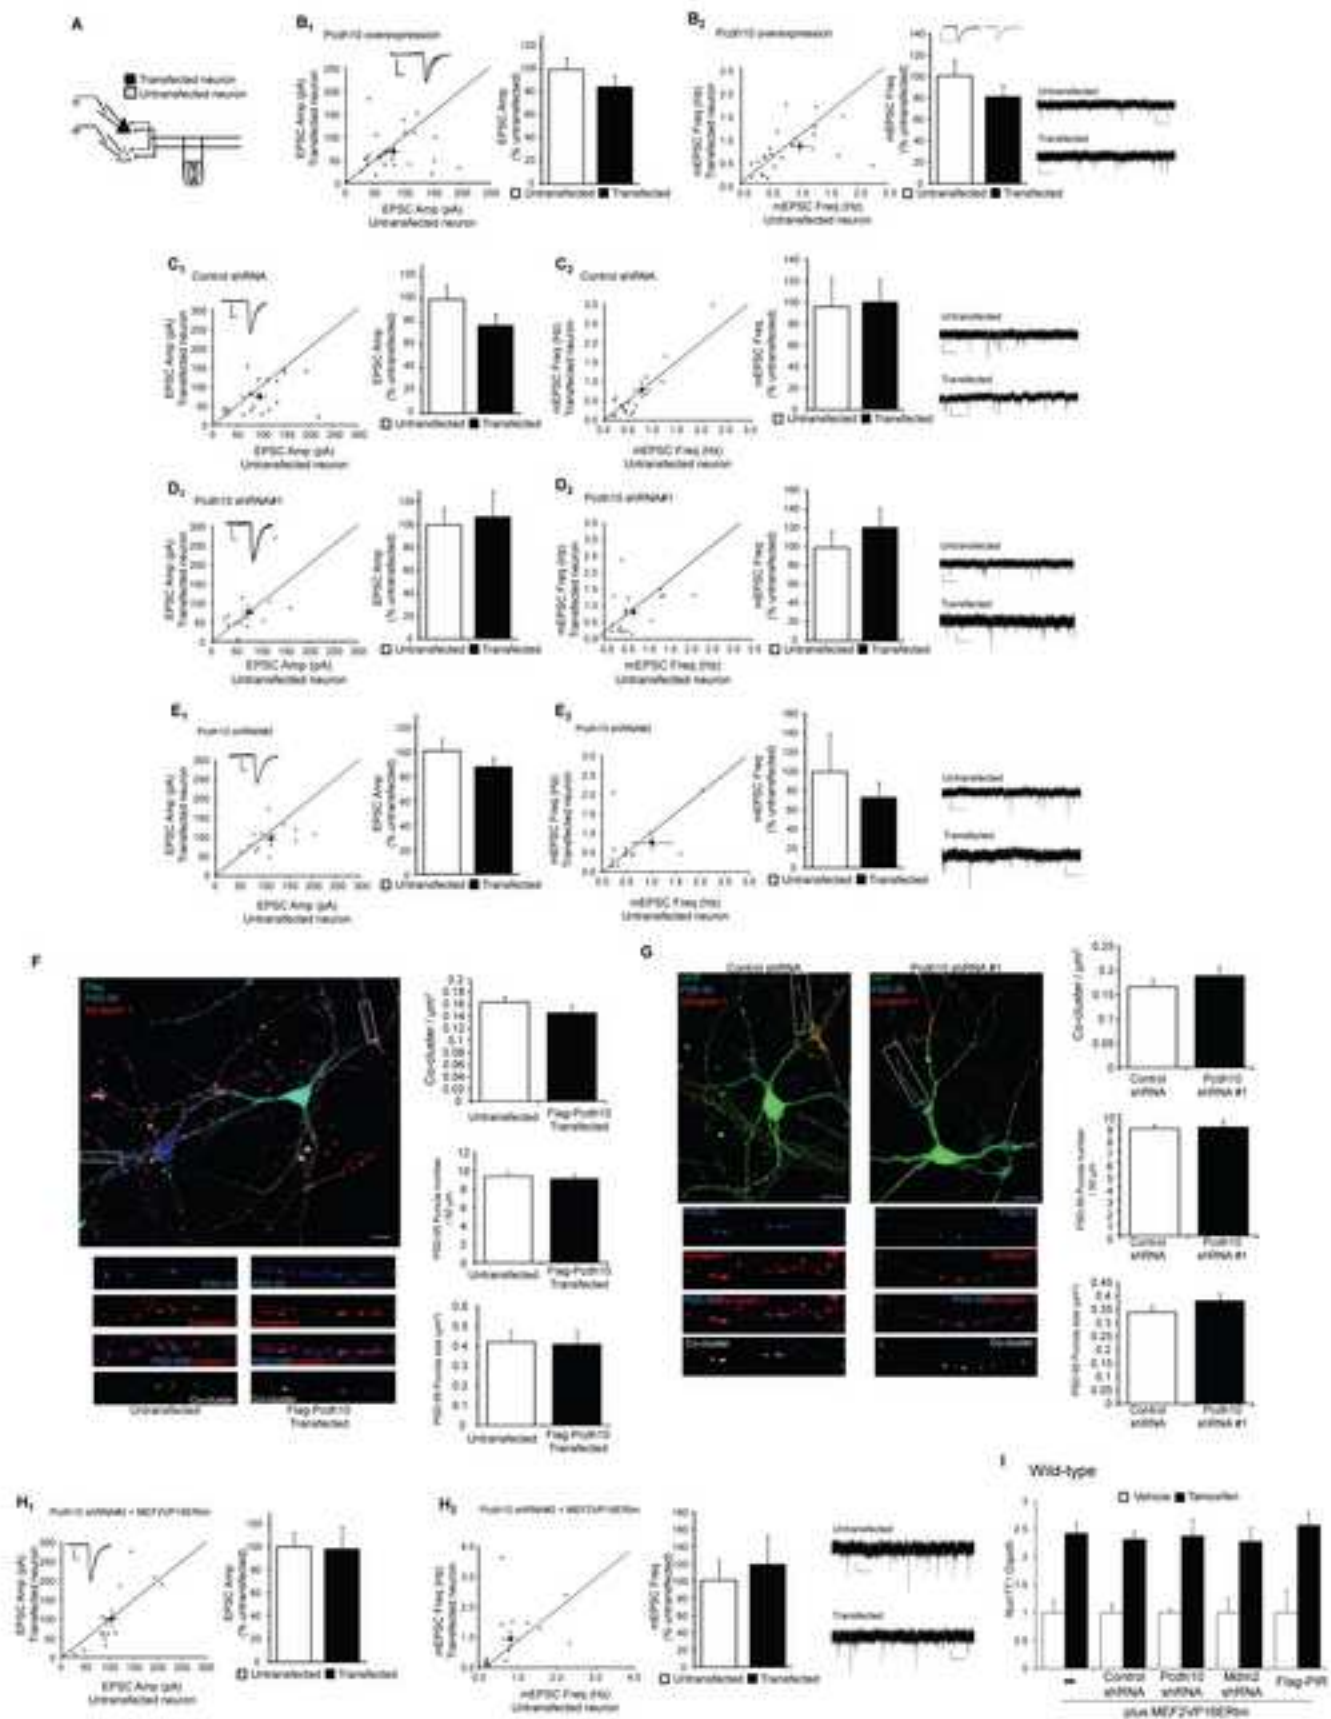

**A**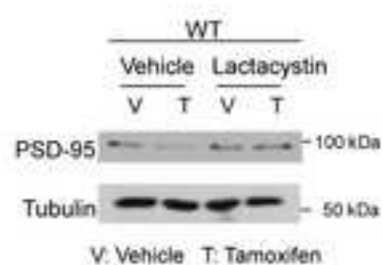

□ Vehicle    ■ Vehicle + Lactacystin  
■ Tamoxifen    □ Tamoxifen + Lactacystin

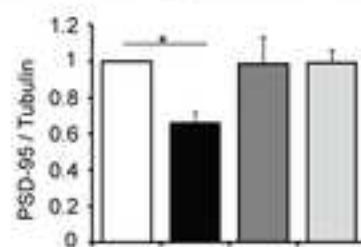**B**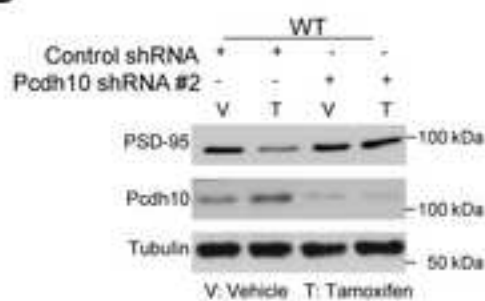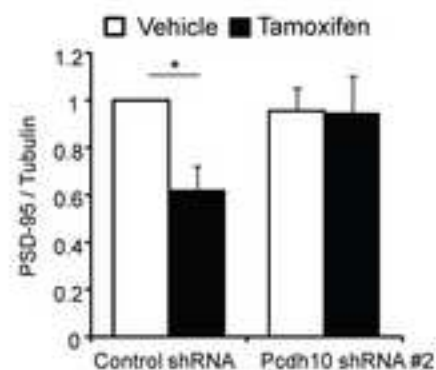**C**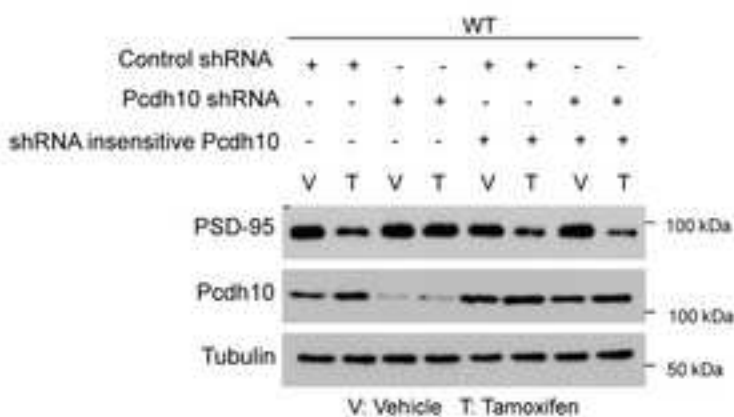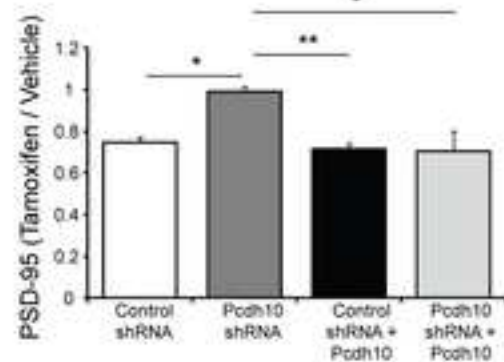

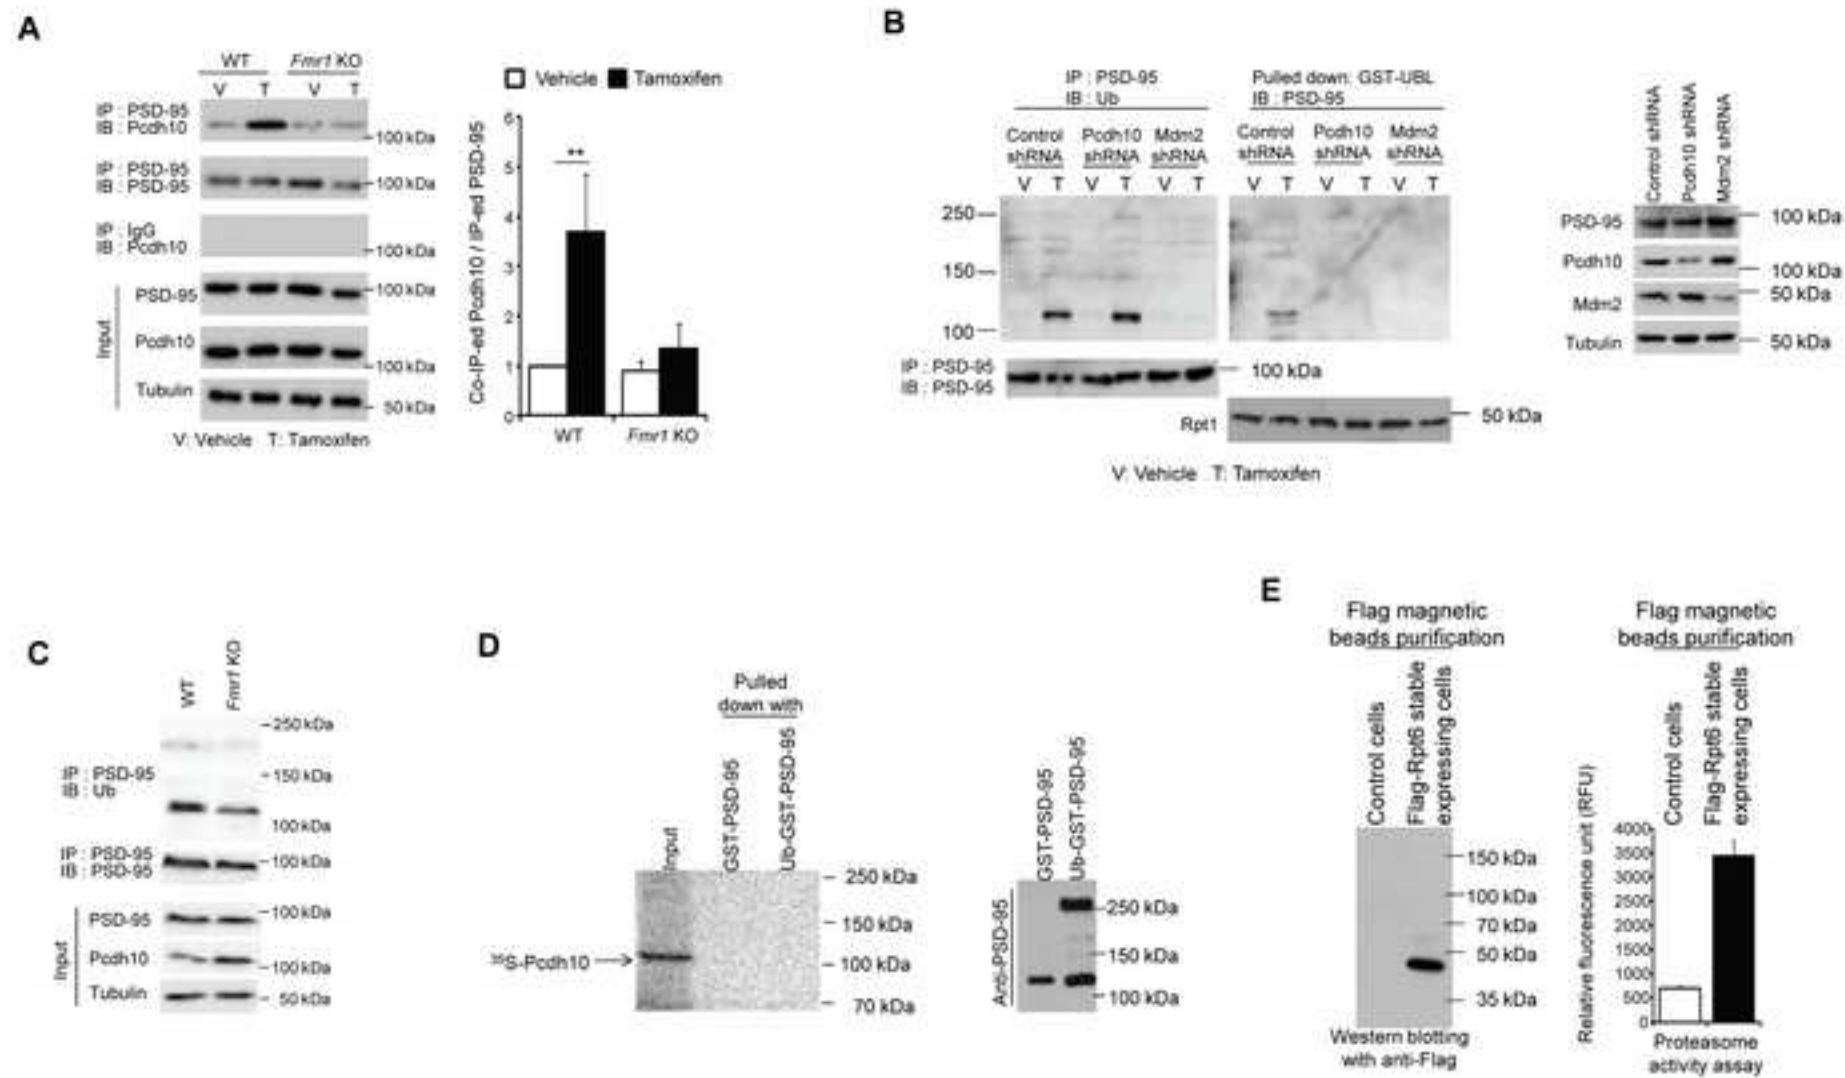





**A**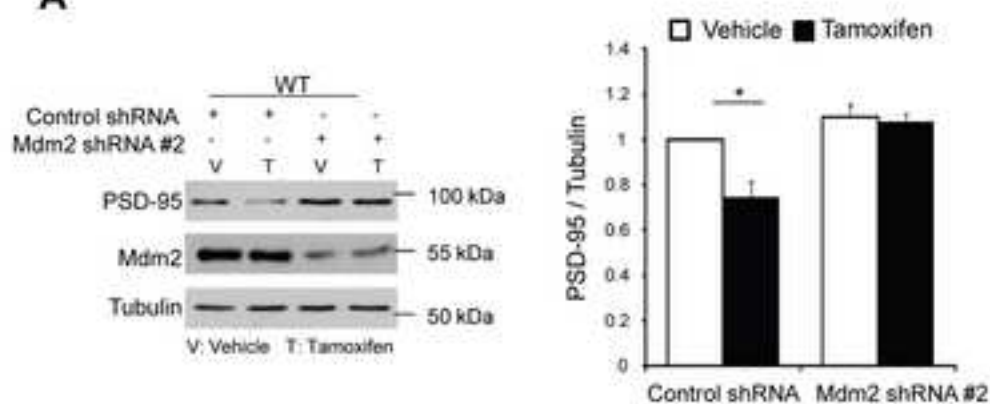**B**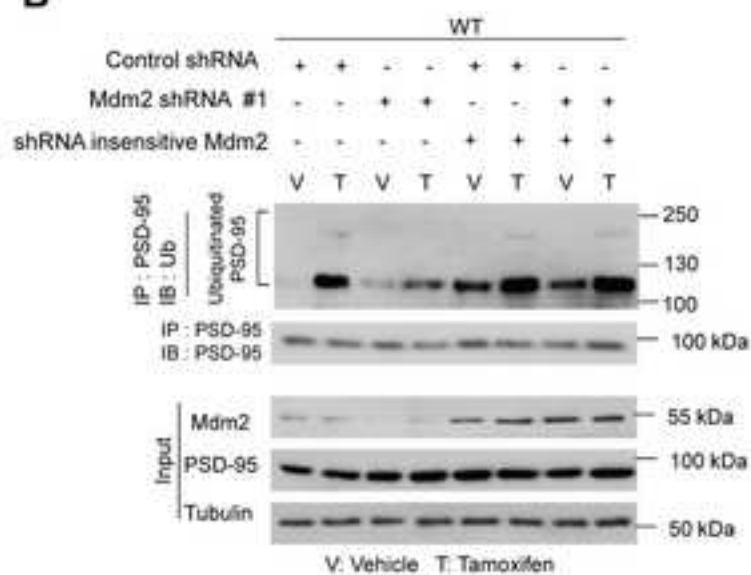**C**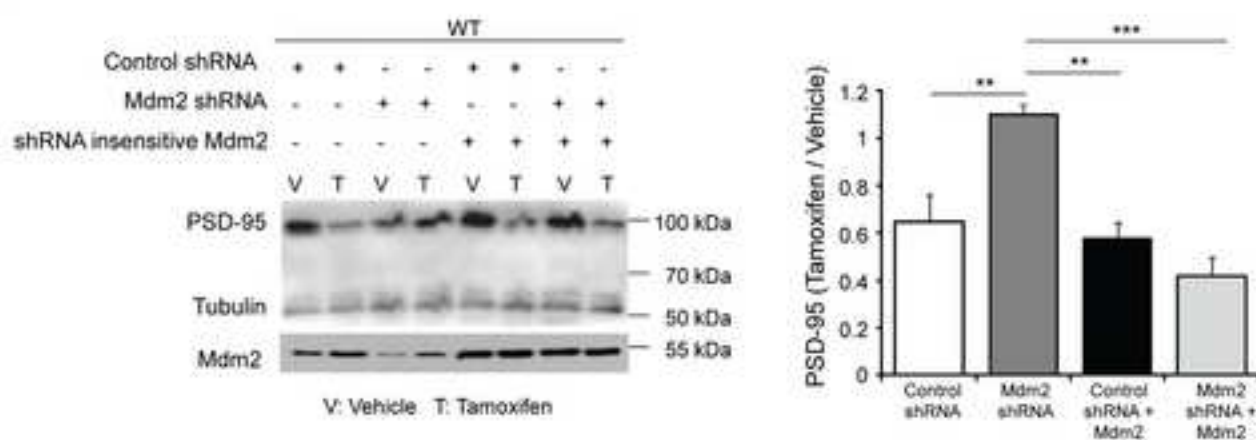

Supplement: NIHMS424735-supplement-02.pdf [file NIHMS424735-supplement-02.pdf]
